# Supplementary material for: Engineering the morphology via processing additives in multiple all-polymer solar cells for improved performance
Source: Royal Society of Chemistry journal article supplement (doi:10.1039/c8ta03343a), 2018-01-01
Supplement: c8ta03343a1.pdf [file c8ta03343a1.pdf]

Electronic Supplementary Information (ESI)

**Engineering the Morphology via Processing Additives in Multiple**

**All-Polymer Solar Cells for Improved Performance**

Jianguo Yuan,<sup>a</sup> Yalong Xu,<sup>a</sup> Guozheng Shi,<sup>a</sup> Xufeng Ling,<sup>a</sup> Tack Ho Lee,<sup>c</sup> Lei Ying,<sup>\*b</sup> Fei Huang,<sup>b</sup> Han Young Woo,<sup>d</sup> Jin Young Kim,<sup>c</sup> Yong Cao,<sup>b</sup> Wanli Ma<sup>\*a</sup>

<sup>a</sup>. Institute of Functional Nano & Soft Materials (FUNSOM), Jiangsu Key Laboratory for Carbon-Based Functional Materials & Devices, Soochow University. 199 Ren-Ai Road, Suzhou Industrial Park, Suzhou, Jiangsu 215123, P. R. China.

<sup>b</sup>. Institute of Polymer Optoelectronic Materials and Devices, State Key Laboratory of Luminescent Materials and Devices, South China University of Technology, Guangzhou 510640, P. R. China.

<sup>c</sup>. Department of Energy Engineering, Ulsan National Institute of Science and Technology (UNIST), Ulsan 44919, Republic of Korea.

<sup>d</sup>. Department of Chemistry, Korea University, 145 Anam-Ro, Seongbuk-Gu, Seoul 02841, Korea.

\*Email: [msleiyang@scut.edu.cn](mailto:msleiyang@scut.edu.cn); [wlma@suda.edu.cn](mailto:wlma@suda.edu.cn)

## **Content**

1. Temperature-dependent UV-vis absorption
2. Current-voltage (J-V) characteristics of PTP8/P(NDI2HD-T) solar cells under different processing condition.
3. Additive-dependent UV-vis absorption
4. Mobility measurements by space charge limited current method
5. GIWAXS measurements
6. Summary of the additive properties
7. Solar cell performance summary

## 1. Temperature-dependent UV-vis absorption

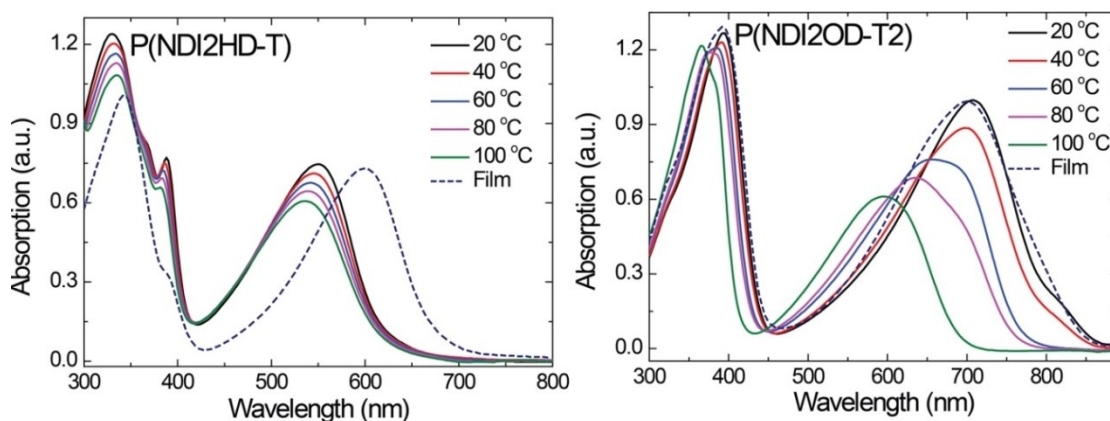

Figure S1. UV-vis absorption spectra of the polymer acceptors in different temperatures in chlorobenzene at a dilute concentration of 0.02 mg/mL.

## 2. Current-voltage (J-V) characteristics of PTP8/P(NDI2HD-T) solar cells under different processing conditions.

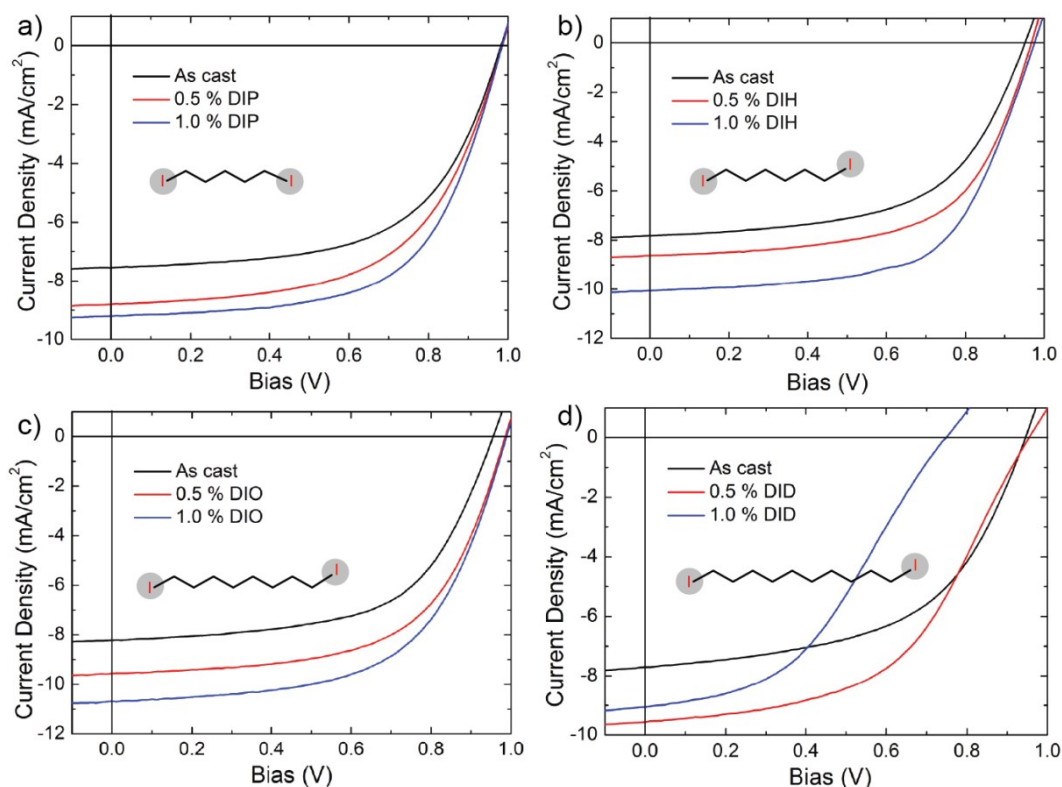

Figure S2. J-V curves of PTP8/P(NDI2HD-T) all-polymer solar cells fabricated with 1,x-diiodinealkane additives measured under standard AM 1.5 solar radiation.

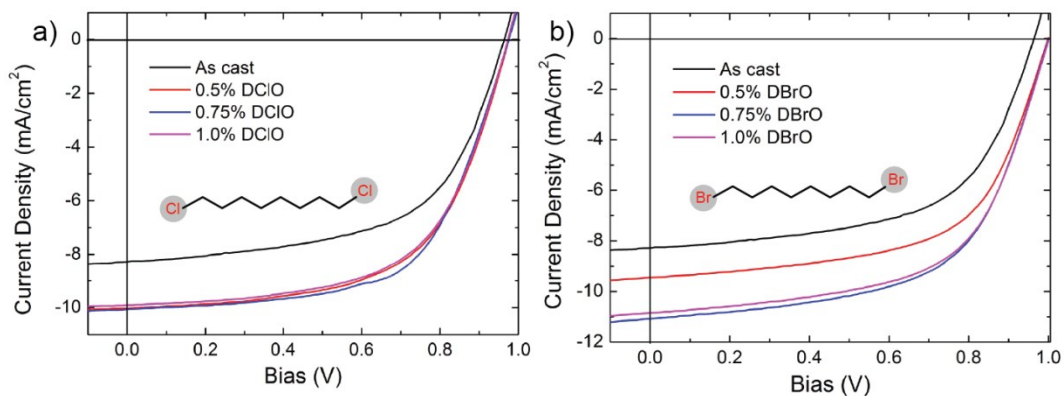

Figure S3. *J-V* curves of PTP8/P(NDI2HD-T) all-polymer solar cells fabricated with 1,8-dichlorooctane (DCIO) and 1,8-dibromooctane (DBrO) additives measured under standard AM 1.5 solar radiation.

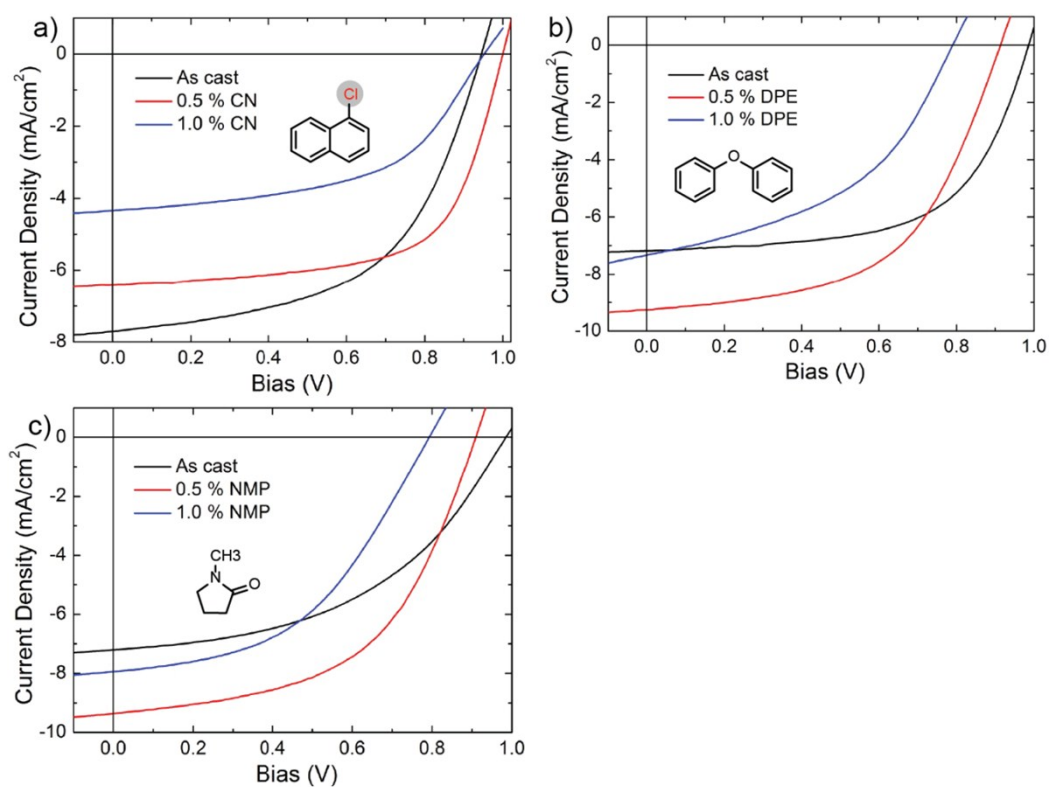

Figure S4. *J-V* curves of PTP8/P(NDI2HD-T) all-polymer solar cells fabricated with 1-chloronaphthalene (CN), diphenyl ether (DPE) and N-methyl-2-pyrrolidone (NMP) additives measured under standard AM 1.5 solar radiation.

### 3. Additive-dependent UV-vis absorption

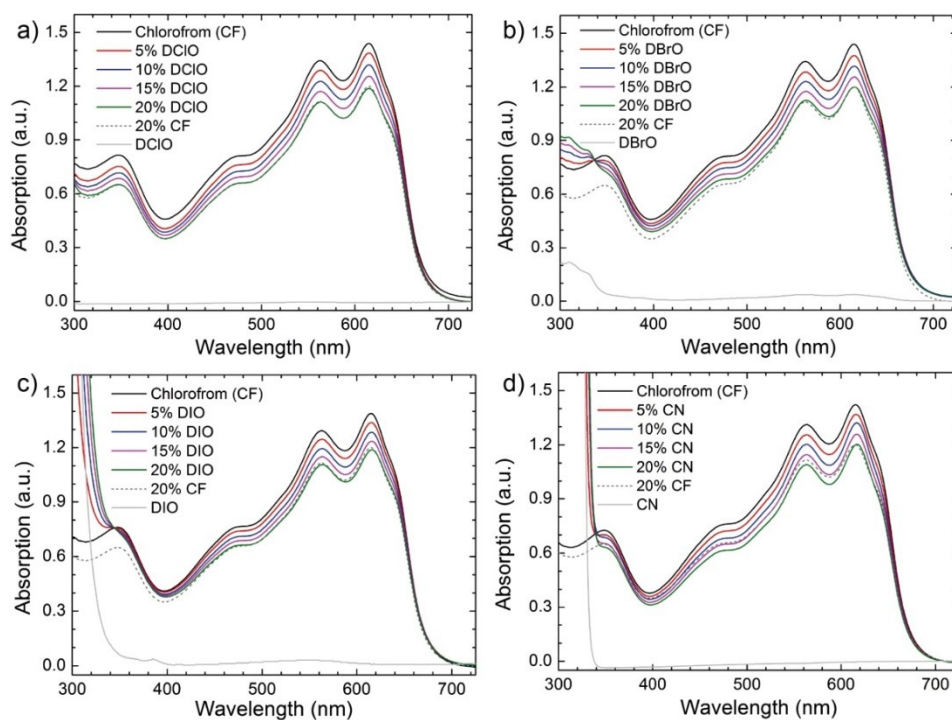

Figure S5. UV-vis absorption of diluted PTP8 solution ( $\sim 0.02$  mg/mL) with different content of DCIO (a); DBrO (b), DIO (c) and CN (d).

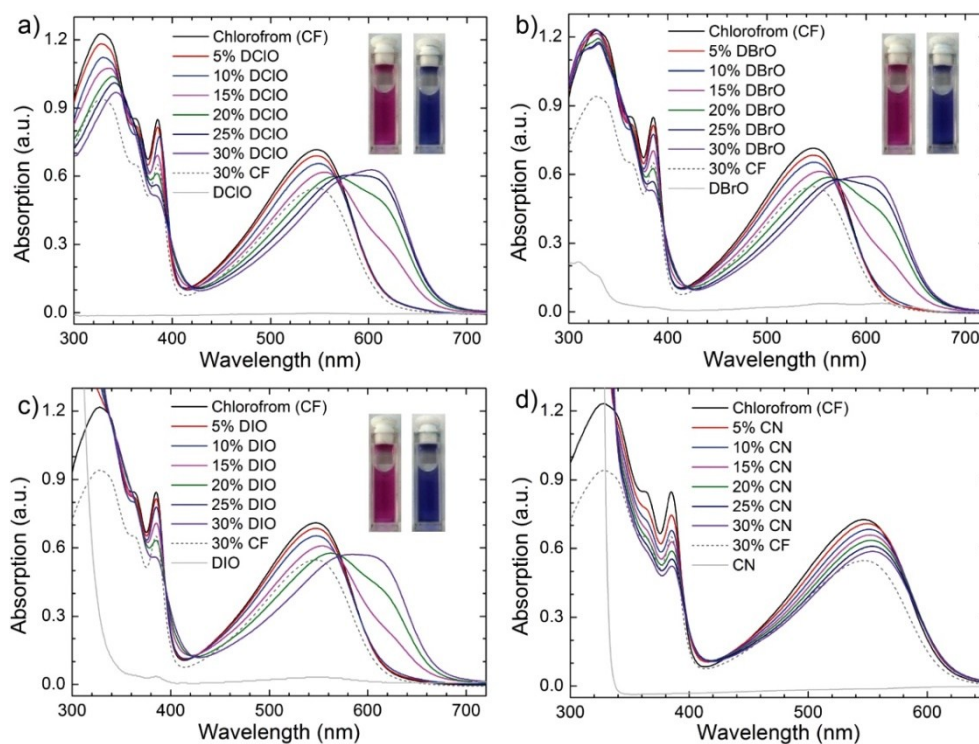

Figure S6. UV-vis absorption of diluted P(NDI2HD-T) solution ( $\sim 0.02$  mg/mL) with different content of DCIO (a); DBrO (b), DIO (c) and CN (d).

#### 4. Mobility measurements by space charge limited current method

Hole-only and electron-only devices were fabricated to measure the hole and electron mobility using the space charge limited current (SCLC) method. The hole-only device structure is ITO/PEDOT:PSS/blend/MoO<sub>x</sub> (6 nm)/Ag (80 nm) and the electron-only device structure is ITO/ZnO/blend/LiF (0.6 nm)/Al (80 nm). The thickness was measured by profilometer. The mobility was determined by fitting the dark current to the model of a single carrier SCLC, which is described by the equation:

$$J = \frac{9}{8} \epsilon_0 \epsilon_r \mu_h \frac{V^2}{d^3},$$

Where  $J$  is the current,  $\epsilon_0$  is the permittivity of free space,  $\epsilon_r$  is the relative permittivity of the material,  $\mu$  is the zero-field mobility,  $d$  is the thickness of the polymer layer,  $V$  is the applied voltage. Then hole and electron mobilities were calculated from the fitting slope of the  $J^{1/2}$ - $V$  curves.

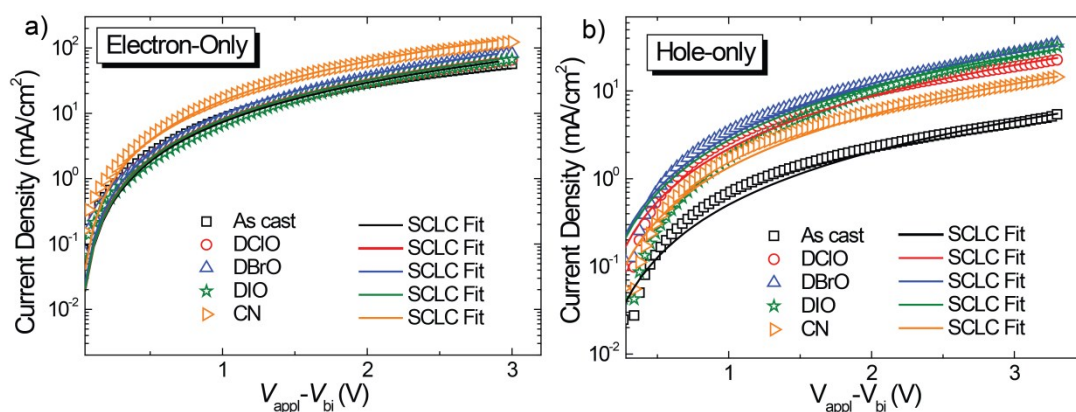

Figure S7  $J$ - $V$  curves of PTP8/P(NDI2HD-T) all-polymer processed from pure solvent and with optimal additive: (a) electron-only and hole-only (b) diodes devices.

#### 5. GIWAXS measurements

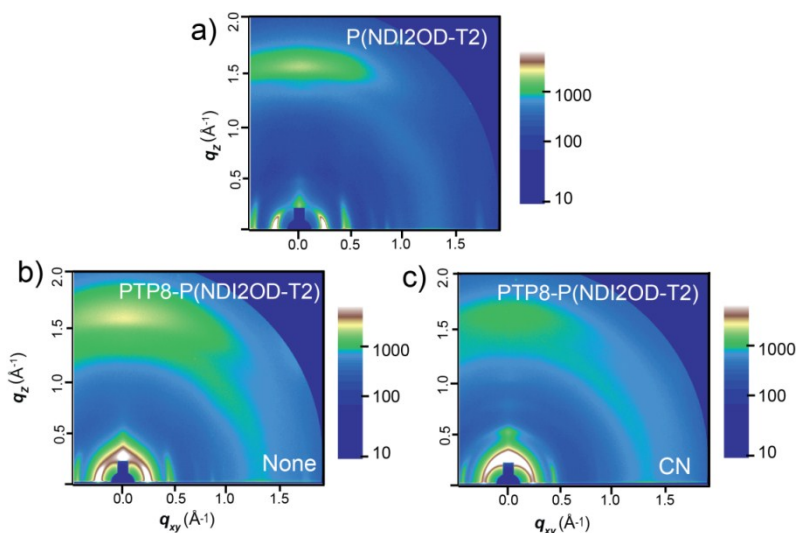

Figure S8. Two-dimensional GIWAXS images of the neat P(NDI2OD-T2) film (a), PTP8/P(NDI2OD-T2) blend films without additive treatment (b) and with optimal CN (c) additive treatment.

## 6. Summary of the additive properties

Table S1. The information of commercial available solvent additive used in this work.

| Solvent Additive | MW     | Boiling-point (°C)    |
|------------------|--------|-----------------------|
| DIP (C5)         | 323.94 | 101-102 °C (3mm Hg)   |
| DIH (C6)         | 337.96 | 141-142 °C (10 mmHg)  |
| DIO (C8)         | 366.02 | 313-315°C (760 mmHg)  |
| DBrO (C8)        | 272.02 | 270-272 °C (760 mmHg) |
| DCIO (C8)        | 183.10 | 241°C (760 mmHg)      |
| DID (C10)        | 394.07 | 349.7 °C (760 mmHg)   |
| CN (C10)         | 162.26 | 259-263 °C (760 mmHg) |
| DPE (C12)        | 170.22 | 257 °C (760 mmHg)     |
| NMP              | 99.1   | 202 °C (760 mmHg)     |

## 7. Solar cell performance summary

**Table S2.** Effect of blend ratios on the performance of as-cast devices based on PTP8/P(NDI2HD-T).

| PTP8/P(NDI2HD-T)<br>(As-cast) | $V_{oc}$<br>(V) | $J_{sc}$<br>(mA/cm <sup>2</sup> ) | $FF$ | $PCE$<br>(%) |
|-------------------------------|-----------------|-----------------------------------|------|--------------|
| 70:30                         | 0.976           | 7.05                              | 0.54 | 3.77         |
| 65:35                         | 0.976           | 7.10                              | 0.57 | 3.92         |
| 60:40                         | 0.975           | 7.96                              | 0.60 | 4.66         |
| 55:45                         | 0.963           | 7.40                              | 0.62 | 4.43         |
| 50:50                         | 0.948           | 7.22                              | 0.57 | 3.89         |

**Table S3.** Effect of solvent additives on the performance of all-PSC devices based on PTP8/P(NDI2HD-T).

| Additive | Vol%  | $V_{oc}$<br>(V) | $J_{sc}$<br>(mA/cm <sup>2</sup> ) | $FF$ | $PCE$<br>(%) |
|----------|-------|-----------------|-----------------------------------|------|--------------|
| None     | 0.0%  | 0.975           | 7.53                              | 59.2 | 4.34         |
| DIP      | 0.5%  | 0.975           | 8.79                              | 58.1 | 4.99         |
| DIP      | 1.0%  | 0.975           | 9.19                              | 61.4 | 5.52         |
| DIP      | 1.5%  | 0.975           | 9.01                              | 59.6 | 5.24         |
| None     | 0.0%  | 0.950           | 7.82                              | 57.5 | 4.26         |
| DIH      | 0.5%  | 0.963           | 8.61                              | 60.9 | 5.10         |
| DIH      | 1.0%  | 0.975           | 10.06                             | 61.6 | 6.05         |
| DIP      | 1.5%  | 0.975           | 9.85                              | 59.8 | 5.74         |
| None     | 0.0%  | 0.950           | 8.21                              | 59.5 | 4.64         |
| DIO      | 0.5%  | 0.975           | 9.56                              | 60.5 | 5.64         |
| DIO      | 1.0%  | 0.988           | 10.58                             | 59.3 | 6.20         |
| DIO      | 1.5%  | 0.988           | 10.05                             | 59.0 | 5.84         |
| None     | 0.0%  | 0.938           | 7.70                              | 54.4 | 3.90         |
| DID      | 0.5%  | 0.950           | 9.54                              | 51.6 | 4.68         |
| DID      | 1.0%  | 0.738           | 9.03                              | 42.8 | 2.86         |
| None     | 0.0%  | 0.963           | 8.25                              | 58.6 | 4.66         |
| DCIO     | 0.5%  | 0.975           | 10.01                             | 59.6 | 5.84         |
| DCIO     | 0.75% | 0.980           | 10.06                             | 61.0 | 6.02         |
| DCIO     | 1.0%  | 0.963           | 9.90                              | 60.3 | 5.75         |
| None     | 0.0%  | 0.938           | 7.70                              | 54.4 | 3.90         |
| DBrO     | 0.5%  | 0.990           | 9.45                              | 60.8 | 5.67         |
| DBrO     | 0.75% | 1.000           | 11.05                             | 59.1 | 6.55         |
| DBrO     | 1.0%  | 1.000           | 10.83                             | 59.6 | 6.45         |
| None     | 0.0%  | 0.938           | 7.70                              | 54.4 | 3.90         |



|      |      |       |      |      |      |
|------|------|-------|------|------|------|
| CN   | 0.5% | 0.990 | 6.42 | 64.9 | 4.15 |
| CN   | 1.0% | 0.950 | 4.33 | 53.4 | 2.20 |
| None | 0.0% | 0.975 | 7.17 | 60.6 | 4.20 |
| DPE  | 0.5% | 0.913 | 9.25 | 54.4 | 4.60 |
| DPE  | 1.0% | 0.788 | 7.29 | 45.3 | 2.61 |
| None | 0.0% | 0.975 | 7.20 | 48.0 | 3.33 |
| NMP  | 0.5% | 0.900 | 9.34 | 53.5 | 4.50 |
| NMP  | 1.0% | 0.788 | 7.92 | 47.1 | 2.94 |

---
